# Supplementary material for: NCK Associated Protein 1 Modulated by miRNA‐214 Determines Vascular Smooth Muscle Cell Migration, Proliferation, and Neointima Hyperplasia
Source: PubMed Central journal article supplement — J Am Heart Assoc. 2016 Dec 7;5(12):e004629. doi: 10.1161/JAHA.116.004629 (PMC5210428; doi:10.1161/jaha.116.004629), 2016-12-07
Supplement: JAH3-5-e004629-s001.pdf [file JAH3-5-e004629-s001.pdf]

*SUPPLEMENTARY DATA*

**NCKAP1 Modulated by miRNA-214 Determines Vascular Smooth Muscle Cell Migration, Proliferation and Neointima Hyperplasia**

Tayyab Adeel Afzal<sup>1#</sup>, Le Anh Luong<sup>1#</sup>, Dan Chen<sup>1,2</sup>, Cheng Zhang<sup>1,2</sup>, Feng Yang<sup>1,3</sup>, Qishan Chen<sup>1,3</sup>, Weiwei An<sup>1</sup>, Edmund Wilkes<sup>5</sup>, Kenta Yashiro<sup>4</sup>, Pedro R. Cutillas<sup>5</sup>, Li Zhang<sup>3\*</sup> and Qingzhong Xiao<sup>1\*</sup>

<sup>1</sup>Centre for Clinical Pharmacology and <sup>4</sup>Translational Medicine & Therapeutics, William Harvey Research Institute, Barts and The London School of Medicine and Dentistry, Queen Mary University of London, London EC1M 6BQ, UK;

<sup>2</sup>Department of Cardiothoracic Surgery, The First Affiliated Hospital of Chongqing Medical University, 400016, Chongqing, China;

<sup>3</sup>Department of Cardiology, the First Affiliated Hospital, School of Medicine, Zhejiang University, 79 Qingchun Road, Hangzhou, 310003, Zhejiang, China;

<sup>5</sup>Centre for Haemato-Oncology, Barts Cancer Institute, Barts and The London School of Medicine and Dentistry, Queen Mary University of London, London EC1M 6BQ, UK.

#T Afzal and L Luong contributed equally to this study

\*Correspondence to:

**Dr Qingzhong Xiao** ([q.xiao@qmul.ac.uk](mailto:q.xiao@qmul.ac.uk)), Centre for Clinical Pharmacology, William Harvey Research Institute, Barts and The London School of Medicine and Dentistry, Queen Mary University of London, Heart Centre, Charterhouse Square, London EC1M 6BQ, United Kingdom. Tel: +44(0)2078826584;

Or

**Dr Li Zhang** ([li.zhang.uk@googlemail.com](mailto:li.zhang.uk@googlemail.com)), Department of Cardiology, the First Affiliated Hospital, School of Medicine, Zhejiang University, 79 Qingchun Road, Hangzhou, 310003, Zhejiang, China; Tel: +86(0)571-87236500.

**Supplementary Figures:**

**A**

Mouse NCKAP1 (NM\_016965.3), 3UTR: 3605~4403

Binding site-1 (BS1) - minimum loop-free energy (RNAhybrid):-51.803

3661 ggaactattt taccttaaag cctgaaaaca gttttgtgga tgaaatttc ttcatgctgt  
 miR-214: 3'-tgacggacagacac-----ggacgaca-5'

BS1<sup>mut</sup>: taccttaaag cctgaaaaca gttttgtgga tgaaatttc ttAaCgcGTG  
 Mlu I (ACGGCT)

Binding site-3 (BS3) - minimum loop-free energy (RNAhybrid): -51.80

4141 tccgaggttc tcagacagca gcacatgctg ccgccgctg tagaaagcct actgtagaaa  
 miR-214: 3'-tgacggaca-gacacgga cgaca-5'

BS3<sup>mut</sup>: tgctgccg ccgcACgtagaaa CgcGtacACTagaaa  
 Mlu I (ACGGCT)

Binding site-2 (BS2) - minimum loop-free energy (RNAhybrid): -51.801

4201 catctcatcc cgtgctgcc ggctggcatc tgcactgcct ttac cctgctgtataataa  
 miR-214: 3'-tgacg-gacagacac-ggacgaca-5'

BS2<sup>mut</sup>: ggcatc tAcactgcct ttac AACgcGTGataataa  
 Mlu I (ACGGCT)

**B**

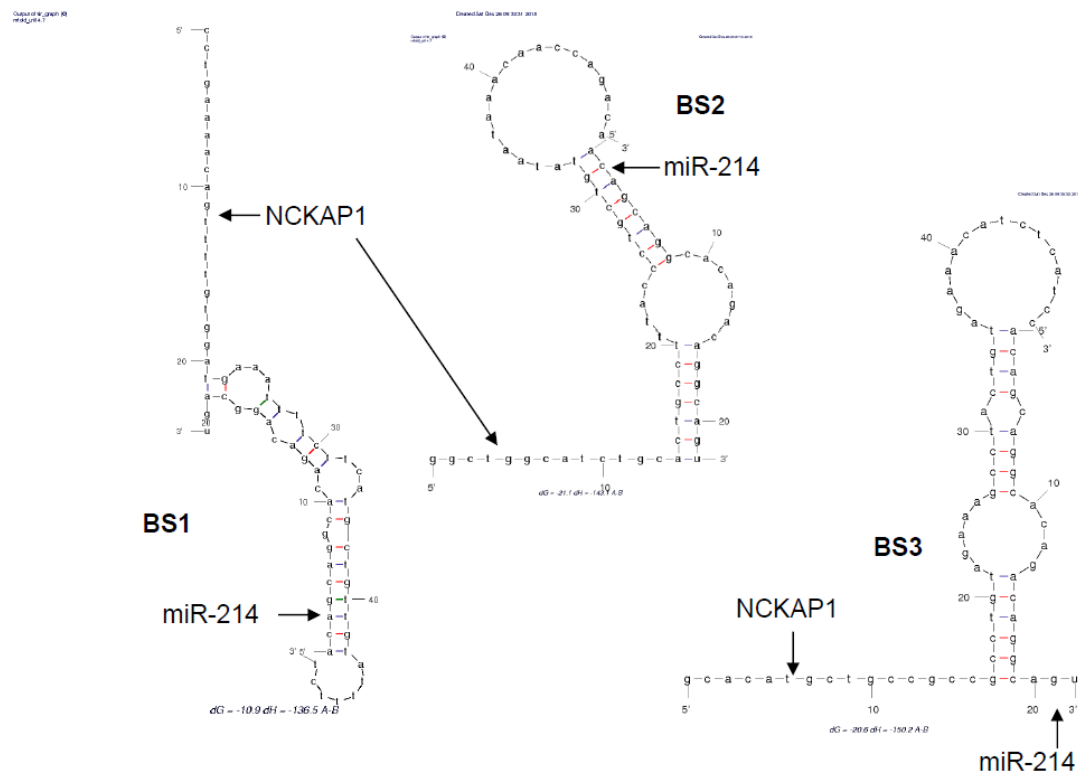

**Figure S1. miR-214 binding sites within 3'UTR of NCKAP1 gene, and the miR-214:NCKAP1 3'UTR duplex stem-loop and respective minimum loop-free energy are depicted in this illustration.**

(A) Three potential wild type binding sites (BS1-BS3) of miR-214 within NCKAP1 3'UTR as predicted by RNAhybrid and their mutants (BS1/2/3<sup>mut</sup>) are depicted in this illustration. (B) The formation of the miR-214:NCKAP1 3'UTR (spanning through miR-214 BS1-3) duplex stem-loop and the minimum loop-free energy for individual

loop (binding site) were calculated by and extracted from mFold software (<http://mfold.rna.albany.edu/?q=DINAMelt/Two-state-melting>).

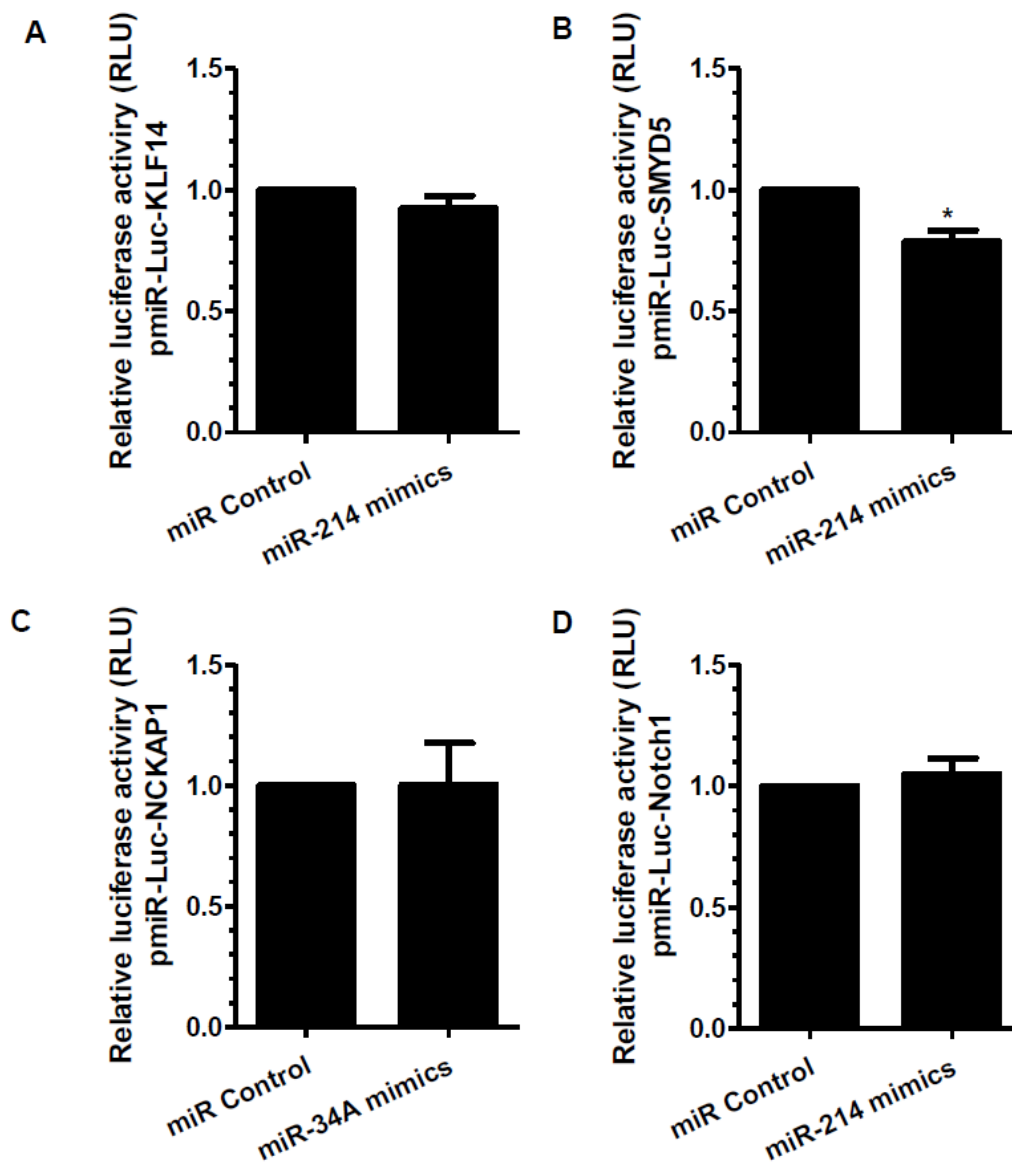

**Figure S2. Gene 3'UTR reporter luciferase activity assays.**

miR-214 mimics, miR-34A mimics or negative control was co-transfected into VSMCs with respective gene 3'UTR reporter (A, KLF14; B, SMYD5; C, NCKAP1; D, Notch1). Luciferase activity assay were measured at 48 hours post-transfection. The data presented here are representative or mean±S.E.M. of four to six independent experiments (n=4-6). \*P<0.05 (versus miR control).

**Supplementary table S1:** Primer sets used in the present study

| <b>Gene names</b>                  | <b>Forward (5'-3')</b>                         | <b>Reverse (5'-3')</b>                                  | <b>Application</b>                            |
|------------------------------------|------------------------------------------------|---------------------------------------------------------|-----------------------------------------------|
| U6 snoRNA (mu/hu)                  | GATGACACGCAAATTCGTG                            | miRNA universal reverse primer (Invitrogen, A11193-051) | Real-time RT-PCR                              |
| Mus/hu miR-214 (mature)            | CAGGCACAGACAGGCAGT                             | miRNA universal reverse primer (Invitrogen, A11193-051) | Real-time RT-PCR                              |
| Mus Pri-miR-214                    | GCAAGGCTATGGCACTTACCTA                         | CCTGTTGTTACTGGCCCTCA                                    | Real-time RT-PCR                              |
| Mus NCKAP1                         | GAGAAGCTCACCATCCTCAAC                          | CAAGAAGCAAGGACAAGTTTGG                                  | Real-time RT-PCR                              |
| Mus PCNA                           | TTGCACGTATATGCCGAGACCT                         | ATTGCCAAGCTCTCCACTTGC                                   | Real-time RT-PCR                              |
| Mus Twist1                         | GAGGTCTTGCCAATCAGCCA                           | CCAGTTTGATCCCAGCGTTT                                    | Real-time RT-PCR                              |
| pmiR-Luc-NCKAP1-WT                 | GTGGTG GAGCTC AGAC AAGCACGAGTTTCTGTTG          | CTGCTG AAGCTT CAAGGTGTGATACAGTCTAGTG                    | NCKAP1 3'UTR reporter clone (Sac I/Hind III)  |
| pmiR-Luc-NCKAP1-BS1 <sup>mut</sup> | gtggatgaaatttcttAaCgcGTGtgattttctgatc attggc   | gccaatgatcagaaaataca CACgcGtT aagaaaattcatccac          | miR-214 binding site 1 mutation               |
| pmiR-Luc-NCKAP1-BS2 <sup>mut</sup> | ggcatctAactgccttacAACgcGTGataataa acaaccagacac | gtgtctggtgtttattatCACgcGTTgtaaaggc agtgTagatgcc         | miR-214 binding site 2 mutation               |
| pmiR-Luc-NCKAP1-BS3 <sup>mut</sup> | tgctgccgccgcACgtagaaCgcGtacACtaga aacatctcatcc | ggatgagatgtttctaGTgtaCgcgttctacGTgc ggcggcagca          | miR-214 binding site 3 mutation               |
| pmiR-Luc-KLF14                     | GTCGTC GAGCTC GACTGTCTTGCTGTCTATCT             | GTCGTC AAGCTT CTCAGCATTTAAAGATTTATAG                    | KLF14 3'UTR reporter clone (Sac I/Hind III)   |
| pmiR-Luc-SMYD5                     | CACGAC GAGCTC TGTTATCTCACCTGGAAGGC             | CACGAC AAGCTT TCACCACTCACATTTTATTGAGAC                  | SMYD5 3'UTR reporter clone (Sac I/Hind III)   |
| pGL3-miR-214-FL                    | gaggag GAGCTC aggggggagccccaactatctga          | gaggag AAGCTT TTCCTGCACCAGGGGCTTGT                      | Mouse miR-214 gene promoter (-640:0) clone    |
| pGL3-miR-214-short                 | gaggag GAGCTC aggggggagccccaactatctga          | ctggtc AAGCTT TGGGGCCCCAGTATGGAAAA                      | Mouse miR-214 gene promoter (-640:-357) clone |

**Supplementary table S2: selected protein list regulated by miR-214 in VSMCs.**

Note: Proteins/genes with yellow-highlighted have been implicated in regulation of cell migration, proliferation, adhesion, actin filament reorganization and actin polymerization, cell cycle, and gene expression, etc.

\* Predicted putative target of miR-214 (only the genes with binding sites within 3'UTR have been included in this table)

| Proteins                                 | Log FR<br>(Treatment vs Control) | P-value | Fold changes<br>(Treatment vs Control) | Binding sites* | Protein Name                                                                            |
|------------------------------------------|----------------------------------|---------|----------------------------------------|----------------|-----------------------------------------------------------------------------------------|
| <b>Downregulated proteins by miR-214</b> |                                  |         |                                        |                |                                                                                         |
| PEPD_MOUSE                               | -2.737973                        | 0.4     | 0.149895                               | No             | Xaa-Pro dipeptidase OS=Mus musculus GN=Pepd PE=2 SV=3                                   |
| ABL2_MOUSE                               | -1.454600                        | 0.5     | 0.364856                               | No             | Abelson tyrosine-protein kinase 2 OS=Mus musculus GN=Abl2 PE=1 SV=1                     |
| LSM8_MOUSE                               | -1.454600                        | 0.5     | 0.364856                               | No             | U6 snRNA-associated Sm-like protein LSm8 OS=Mus musculus GN=Lsm8 PE=3 SV=3              |
| NCKP1_MOUSE                              | -1.434939                        | 0       | 0.369863                               | Yes (3)        | Nck-associated protein 1 OS=Mus musculus GN=Nckap1 PE=1 SV=2                            |
| HYPK_MOUSE                               | -1.353127                        | 0       | 0.391443                               | yes (1)        | Huntingtin-interacting protein K OS=Mus musculus GN=Hypk PE=2 SV=2                      |
| COX2_MOUSE                               | -1.302748                        | 0       | 0.405353                               | No             | Cytochrome c oxidase subunit 2 OS=Mus musculus GN=Mtco2 PE=1 SV=1                       |
| EMAL1_MOUSE                              | -1.160103                        | 0       | 0.447481                               | yes (1)        | Echinoderm microtubule-associated protein-like 1 OS=Mus musculus GN=Em1 PE=1 SV=1       |
| SYAP1_MOUSE                              | -1.021893                        | 0.5     | 0.49247                                | No             | Synapse-associated protein 1 OS=Mus musculus GN=Syap1 PE=1 SV=1                         |
| SPTB1_MOUSE                              | -0.918821                        | 0       | 0.528941                               | Yes (2)        | Spectrin beta chain, erythrocytic OS=Mus musculus GN=Sptb PE=1 SV=4                     |
| ILEUC_MOUSE                              | -0.827446                        | 0.5     | 0.563526                               | No             | Leukocyte elastase inhibitor C OS=Mus musculus GN=Serpinb1c PE=2 SV=1                   |
| LYPA2_MOUSE                              | -0.806064                        | 0       | 0.57194                                | Yes (1)        | Acyl-protein thioesterase 2 OS=Mus musculus GN=Lypla2 PE=1 SV=1                         |
| KLF14_MOUSE                              | -0.793026                        | 0       | 0.577132                               | Yes (2)        | Krueppel-like factor 14 OS=Mus musculus GN=Klf14 PE=2 SV=1                              |
| ARPC2_MOUSE                              | -0.786859                        | 0       | 0.579604                               | no             | Actin-related protein 2/3 complex subunit 2 OS=Mus musculus GN=Arpc2 PE=1 SV=3          |
| PGM1_MOUSE                               | -0.786171                        | 0.1     | 0.579881                               | No             | Phosphoglucomutase-1 OS=Mus musculus GN=Pgm1 PE=1 SV=4                                  |
| PPM1F_MOUSE                              | -0.753456                        | 0       | 0.593181                               | Yes (3)        | Protein phosphatase 1F OS=Mus musculus GN=Ppm1f PE=2 SV=1                               |
| ABHEB_MOUSE                              | -0.704636                        | 0.1     | 0.613597                               | No             | Alpha/beta hydrolase domain-containing protein 14B OS=Mus musculus GN=Abhd14b PE=2 SV=1 |
| TPP1_MOUSE                               | -0.689847                        | 0       | 0.61992                                | Yes (5)        | Tripeptidyl-peptidase 1 OS=Mus                                                          |

|              |           |     |          |         |                                                                                                    |
|--------------|-----------|-----|----------|---------|----------------------------------------------------------------------------------------------------|
|              |           |     |          |         | musculus GN=Tpp1 PE=1 SV=2                                                                         |
| SNX12_MOUSE  | -0.670723 | 0.1 | 0.628192 |         | Sorting nexin-12 OS=Mus musculus GN=Snx12 PE=1 SV=1                                                |
| CIRBP_MOUSE  | -0.659948 | 0.1 | 0.632901 | No      | Cold-inducible RNA-binding protein OS=Mus musculus GN=Cirbp PE=1 SV=1                              |
| IDHC_MOUSE   | -0.653167 | 0   | 0.635883 | Yes (2) | Isocitrate dehydrogenase [NADP] cytoplasmic OS=Mus musculus GN=Idh1 PE=1 SV=2                      |
| INT3_MOUSE   | -0.632013 | 0   | 0.645275 | Yes (2) | Integrator complex subunit 3 OS=Mus musculus GN=Ints3 PE=2 SV=2                                    |
| LIMS2_MOUSE  | -0.599727 | 0   | 0.659879 | No      | LIM and senescent cell antigen-like-containing domain protein 2 OS=Mus musculus GN=Lims2 PE=1 SV=1 |
| SNX5_MOUSE   | -0.595149 | 0   | 0.661976 | Yes (1) | Sorting nexin-5 OS=Mus musculus GN=Snx5 PE=1 SV=1                                                  |
| SMYD5_MOUSE  | -0.572227 | 0   | 0.672578 | Yes (4) | SET and MYND domain-containing protein 5 OS=Mus musculus GN=Smyd5 PE=2 SV=2                        |
| APC7_MOUSE   | -0.553523 | 0   | 0.681354 | Yes (2) | Anaphase-promoting complex subunit 7 OS=Mus musculus GN=Anapc7 PE=1 SV=3                           |
| ACOT9_MOUSE  | -0.552868 | 0   | 0.681664 | Yes (2) | Acyl-coenzyme A thioesterase 9, mitochondrial OS=Mus musculus GN=Acot9 PE=1 SV=1                   |
| LONM_MOUSE   | -0.550077 | 0   | 0.682983 | Yes (1) | Lon protease homolog, mitochondrial OS=Mus musculus GN=Lonp1 PE=1 SV=2                             |
| SNP29_MOUSE  | -0.543593 | 0   | 0.68606  | yes (3) | Synaptosomal-associated protein 29 OS=Mus musculus GN=Snap29 PE=2 SV=1                             |
| FKBP10_MOUSE | -0.528053 | 0.4 | 0.69349  | No      | Peptidyl-prolyl cis-trans isomerase FKBP10 OS=Mus musculus GN=Fkbp10 PE=1 SV=2                     |
| GSTM1_MOUSE  | -0.518952 | 0   | 0.697878 | Yes (2) | Glutathione S-transferase Mu 1 OS=Mus musculus GN=Gstm1 PE=1 SV=2                                  |
| KIME_MOUSE   | -0.515848 | 0   | 0.699382 | yes (1) | Mevalonate kinase OS=Mus musculus GN=Mvk PE=2 SV=1                                                 |
| ARL3_MOUSE   | -0.512953 | 0   | 0.700787 | Yes (1) | ADP-ribosylation factor-like protein 3 OS=Mus musculus GN=Arl3 PE=1 SV=1                           |
| SAMH1_MOUSE  | -0.484792 | 0   | 0.7146   | Yes (2) | Deoxynucleoside triphosphate triphosphohydrolase SAMHD1 OS=Mus musculus GN=Samhd1 PE=1 SV=2        |
| SRRT_MOUSE   | -0.483568 | 0   | 0.715207 | Yes (1) | Serrate RNA effector molecule homolog OS=Mus musculus GN=Srrt PE=1 SV=1                            |
| AP2B1_MOUSE  | -0.474446 | 0   | 0.719743 | Yes (6) | AP-2 complex subunit beta OS=Mus musculus GN=Ap2b1 PE=1 SV=1                                       |
| PROF1_MOUSE  | -0.472765 | 0   | 0.720582 | Yes (2) | Profilin-1 OS=Mus musculus GN=Pfn1 PE=1 SV=2                                                       |
| GSTM2_MOUSE  | -0.470258 | 0   | 0.721836 | Yes (1) | Glutathione S-transferase Mu 2 OS=Mus musculus GN=Gstm2 PE=1 SV=2                                  |

|             |           |     |          |         |                                                                                             |
|-------------|-----------|-----|----------|---------|---------------------------------------------------------------------------------------------|
| CAPZB_MOUSE | -0.463590 | 0.3 | 0.725179 | No      | F-actin-capping protein subunit beta OS=Mus musculus GN=Capzb PE=1 SV=3                     |
| TGM2_MOUSE  | -0.461355 | 0   | 0.726304 | Yes (4) | Protein-glutamine gamma-glutamyltransferase 2 OS=Mus musculus GN=Tgm2 PE=1 SV=4             |
| RCN3_MOUSE  | -0.457328 | 0   | 0.728334 | No      | Reticulocalbin-3 OS=Mus musculus GN=Rcn3 PE=2 SV=1                                          |
| SMC3_MOUSE  | -0.451019 | 0   | 0.731526 | Yes (5) | Structural maintenance of chromosomes protein 3 OS=Mus musculus GN=Smc3 PE=1 SV=2           |
| RHOA_MOUSE  | -0.447904 | 0   | 0.733107 | Yes (1) | Transforming protein RhoA OS=Mus musculus GN=Rhoa PE=1 SV=1                                 |
| G3BP1_MOUSE | -0.444125 | 0   | 0.73503  | Yes (7) | Ras GTPase-activating protein-binding protein 1 OS=Mus musculus GN=G3bp1 PE=1 SV=1          |
| LAMP1_MOUSE | -0.443885 | 0   | 0.735152 | Yes (1) | Lysosome-associated membrane glycoprotein 1 OS=Mus musculus GN=Lamp1 PE=1 SV=2              |
| SMC1A_MOUSE | -0.443237 | 0   | 0.735483 | Yes (1) | Structural maintenance of chromosomes protein 1A OS=Mus musculus GN=Smc1a PE=1 SV=4         |
| SPI2_MOUSE  | -0.441805 | 0.5 | 0.736213 | No      | Serpin I2 OS=Mus musculus GN=Serpini2 PE=2 SV=1                                             |
| PLSI_MOUSE  | -0.440962 | 0   | 0.736643 | Yes (2) | Plastin-1 OS=Mus musculus GN=Pls1 PE=2 SV=1                                                 |
| LTOR3_MOUSE | -0.439528 | 0   | 0.737376 | Yes (3) | Ragulator complex protein LAMTOR3 OS=Mus musculus GN=Lamtor3 PE=1 SV=1                      |
| PSB4_MOUSE  | -0.438911 | 0   | 0.737691 | No      | Proteasome subunit beta type-4 OS=Mus musculus GN=Psmb4 PE=1 SV=1                           |
| THIM_MOUSE  | -0.437870 | 0   | 0.738224 | Yes (2) | 3-ketoacyl-CoA thiolase, mitochondrial OS=Mus musculus GN=Acaa2 PE=1 SV=3                   |
| STK25_MOUSE | -0.434782 | 0   | 0.739805 | Yes (1) | Serine/threonine-protein kinase 25 OS=Mus musculus GN=Stk25 PE=1 SV=2                       |
| CATD_MOUSE  | -0.434733 | 0   | 0.739831 | Yes (4) | Cathepsin D OS=Mus musculus GN=Ctsd PE=1 SV=1                                               |
| ULA1_MOUSE  | -0.433753 | 0   | 0.740333 | No      | NEDD8-activating enzyme E1 regulatory subunit OS=Mus musculus GN=Nae1 PE=1 SV=1             |
| TBAL3_MOUSE | -0.433621 | 0   | 0.740401 | Yes (1) | Tubulin alpha chain-like 3 OS=Mus musculus GN=Tubal3 PE=2 SV=2                              |
| CSN5_MOUSE  | -0.431786 | 0.1 | 0.741343 | No      | COP9 signalosome complex subunit 5 OS=Mus musculus GN=Cops5 PE=1 SV=3                       |
| PPP6_MOUSE  | -0.421643 | 0   | 0.746574 | Yes (2) | Serine/threonine-protein phosphatase 6 catalytic subunit OS=Mus musculus GN=Ppp6c PE=2 SV=1 |
| RS27A_MOUSE | -0.421124 | 0   | 0.746842 | No      | Ubiquitin-40S ribosomal protein S27a OS=Mus musculus GN=Rps27a PE=1 SV=2                    |
| CBX1_MOUSE  | -0.419343 | 0   | 0.747765 | Yes (2) | Chromobox protein homolog 1 OS=Mus musculus GN=Cbx1 PE=1 SV=1                               |

|                                        |           |     |          |         |                                                                                            |
|----------------------------------------|-----------|-----|----------|---------|--------------------------------------------------------------------------------------------|
| MK10_MOUSE                             | -0.418101 | 0   | 0.748409 | Yes (3) | Mitogen-activated protein kinase 10<br>OS=Mus musculus GN=Mapk10<br>PE=1 SV=2              |
| <b>Upregulated proteins by miR-214</b> |           |     |          |         |                                                                                            |
| PSB7_MOUSE                             | 0.323204  | 0.2 | 1.251106 |         | Proteasome subunit beta type-7<br>OS=Mus musculus GN=Psm7<br>PE=1 SV=1                     |
| DPOE1_MOUSE                            | 0.323513  | 0.1 | 1.251374 |         | DNA polymerase epsilon catalytic<br>subunit A OS=Mus musculus<br>GN=Pole PE=2 SV=3         |
| CALX_MOUSE                             | 0.325062  | 0.3 | 1.252718 |         | Calnexin OS=Mus musculus<br>GN=Canx PE=1 SV=1                                              |
| COPZ1_MOUSE                            | 0.326198  | 0.3 | 1.253705 |         | Coatomer subunit zeta-1 OS=Mus<br>musculus GN=Copz1 PE=2 SV=1                              |
| VPS29_MOUSE                            | 0.327551  | 0.1 | 1.254881 |         | Vacuolar protein sorting-associated<br>protein 29 OS=Mus musculus<br>GN=Vps29 PE=1 SV=1    |
| NASP_MOUSE                             | 0.328329  | 0.1 | 1.255558 |         | Nuclear autoantigenic sperm protein<br>OS=Mus musculus GN=Nasp PE=1<br>SV=2                |
| HNRPK_MOUSE                            | 0.328623  | 0.2 | 1.255814 |         | Heterogeneous nuclear<br>ribonucleoprotein K OS=Mus<br>musculus GN=Hnrpk PE=1 SV=1         |
| RTCB_MOUSE                             | 0.328922  | 0.5 | 1.256075 |         | tRNA-splicing ligase RtcB homolog<br>OS=Mus musculus GN=RtcB PE=2<br>SV=1                  |
| UBL4A_MOUSE                            | 0.329965  | 0.2 | 1.256983 |         | Ubiquitin-like protein 4A OS=Mus<br>musculus GN=Ubl4a PE=2 SV=1                            |
| H12_MOUSE                              | 0.330383  | 0.3 | 1.257347 |         | Histone H1.2 OS=Mus musculus<br>GN=Hist1h1c PE=1 SV=2                                      |
| PHB2_MOUSE                             | 0.332705  | 0   | 1.259372 |         | Prohibitin-2 OS=Mus musculus<br>GN=Phb2 PE=1 SV=1                                          |
| SC61B_MOUSE                            | 0.335326  | 0.2 | 1.261662 |         | Protein transport protein Sec61<br>subunit beta OS=Mus musculus<br>GN=Sec61b PE=1 SV=3     |
| CNPY2_MOUSE                            | 0.339157  | 0.3 | 1.265017 |         | Protein canopy homolog 2 OS=Mus<br>musculus GN=Cnpy2 PE=1 SV=1                             |
| TRXR1_MOUSE                            | 0.340636  | 0.1 | 1.266315 |         | Thioredoxin reductase 1,<br>cytoplasmic OS=Mus musculus<br>GN=Txnr1 PE=1 SV=3              |
| QCR1_MOUSE                             | 0.341453  | 0.2 | 1.267032 |         | Cytochrome b-c1 complex subunit 1,<br>mitochondrial OS=Mus musculus<br>GN=Uqcrc1 PE=1 SV=2 |
| RFA2_MOUSE                             | 0.341865  | 0   | 1.267394 |         | Replication protein A 32 kDa subunit<br>OS=Mus musculus GN=Rpa2 PE=1<br>SV=1               |
| UBE2K_MOUSE                            | 0.343689  | 0.2 | 1.268997 |         | Ubiquitin-conjugating enzyme E2 K<br>OS=Mus musculus GN=Ube2k PE=1<br>SV=3                 |
| NUCB2_MOUSE                            | 0.348476  | 0.3 | 1.273215 |         | Nucleobindin-2 OS=Mus musculus<br>GN=Nucb2 PE=1 SV=2                                       |
| ALR_MOUSE                              | 0.349409  | 0.5 | 1.274038 |         | FAD-linked sulfhydryl oxidase ALR<br>OS=Mus musculus GN=Gfer PE=2<br>SV=2                  |
| TIA1_MOUSE                             | 0.352377  | 0.1 | 1.276662 |         | Nucleolysin TIA-1 OS=Mus<br>musculus GN=Tia1 PE=1 SV=1                                     |
| TBC15_MOUSE                            | 0.353875  | 0.4 | 1.277988 |         | TBC1 domain family member 15                                                               |



|                  |          |     |          |                                                                                                                      |
|------------------|----------|-----|----------|----------------------------------------------------------------------------------------------------------------------|
| E                |          |     |          | OS=Mus musculus GN=Tbc1d15<br>PE=1 SV=1                                                                              |
| LSM6_MOUSE       | 0.356710 | 0   | 1.280502 | U6 snRNA-associated Sm-like<br>protein LSm6 OS=Mus musculus<br>GN=Lsm6 PE=3 SV=1                                     |
| IMPA2_MOUSE      | 0.357044 | 0.6 | 1.280799 | Inositol monophosphatase 2<br>OS=Mus musculus GN=Impa2 PE=1<br>SV=1                                                  |
| VATA_MOUSE       | 0.360771 | 0.2 | 1.284112 | V-type proton ATPase catalytic<br>subunit A OS=Mus musculus<br>GN=Atp6v1a PE=1 SV=2                                  |
| CTBP1_MOUSE<br>E | 0.364133 | 0   | 1.287108 | C-terminal-binding protein 1<br>OS=Mus musculus GN=Ctbp1 PE=1<br>SV=2                                                |
| SZT2_MOUSE       | 0.365471 | 0.2 | 1.288303 | Protein SZT2 OS=Mus musculus<br>GN=Szt2 PE=1 SV=1                                                                    |
| RBM25_MOUSE<br>E | 0.365489 | 0   | 1.288318 | RNA-binding protein 25 OS=Mus<br>musculus GN=Rbm25 PE=1 SV=2                                                         |
| PTMS_MOUSE       | 0.366225 | 0.7 | 1.288976 | Parathymosin OS=Mus musculus<br>GN=Ptms PE=1 SV=3                                                                    |
| INF2_MOUSE       | 0.367510 | 0.1 | 1.290124 | Inverted formin-2 OS=Mus musculus<br>GN=Inf2 PE=1 SV=1                                                               |
| ILF3_MOUSE       | 0.368909 | 0   | 1.291376 | Interleukin enhancer-binding factor 3<br>OS=Mus musculus GN=Ilf3 PE=1<br>SV=2                                        |
| PABP2_MOUSE<br>E | 0.371446 | 0.1 | 1.293649 | Polyadenylate-binding protein 2<br>OS=Mus musculus GN=Pabpn1<br>PE=2 SV=3                                            |
| ALD2_MOUSE       | 0.372046 | 0.2 | 1.294187 | Aldose reductase-related protein 2<br>OS=Mus musculus GN=Akr1b8<br>PE=1 SV=2                                         |
| TCOF_MOUSE       | 0.373927 | 0   | 1.295875 | Treacle protein OS=Mus musculus<br>GN=Tcof1 PE=1 SV=1                                                                |
| I2BP2_MOUSE      | 0.374380 | 0.3 | 1.296283 | Interferon regulatory factor 2-binding<br>protein 2 OS=Mus musculus<br>GN=Irf2bp2 PE=1 SV=1                          |
| H32_MOUSE        | 0.375301 | 0.2 | 1.29711  | Histone H3.2 OS=Mus musculus<br>GN=Hist1h3b PE=1 SV=2                                                                |
| XRN2_MOUSE       | 0.376271 | 0.3 | 1.297983 | 5'-3' exoribonuclease 2 OS=Mus<br>musculus GN=Xrn2 PE=1 SV=1                                                         |
| CK5P2_MOUSE<br>E | 0.376365 | 0.2 | 1.298067 | CDK5 regulatory subunit-associated<br>protein 2 OS=Mus musculus<br>GN=Cdk5rap2 PE=1 SV=3                             |
| RPN1_MOUSE       | 0.377760 | 0.1 | 1.299323 | Dolichyl-diphosphooligosaccharide--<br>protein glycosyltransferase subunit 1<br>OS=Mus musculus GN=Rpn1 PE=1<br>SV=1 |
| RS28_MOUSE       | 0.378317 | 0.3 | 1.299825 | 40S ribosomal protein S28 OS=Mus<br>musculus GN=Rps28 PE=2 SV=1                                                      |
| API5_MOUSE       | 0.378529 | 0.3 | 1.300016 | Apoptosis inhibitor 5 OS=Mus<br>musculus GN=Api5 PE=1 SV=2                                                           |
| IF2B3_MOUSE      | 0.379407 | 0.2 | 1.300807 | Insulin-like growth factor 2 mRNA-<br>binding protein 3 OS=Mus musculus<br>GN=Igf2bp3 PE=1 SV=1                      |
| CUL4B_MOUSE<br>E | 0.379845 | 0.2 | 1.301202 | Cullin-4B OS=Mus musculus<br>GN=Cul4b PE=1 SV=1                                                                      |
| NXT2_MOUSE       | 0.380032 | 0.1 | 1.30137  | NTF2-related export protein 2<br>OS=Mus musculus GN=Nxt2 PE=2                                                        |

|             |          |     |          |  |                                                                                                               |
|-------------|----------|-----|----------|--|---------------------------------------------------------------------------------------------------------------|
|             |          |     |          |  | SV=1                                                                                                          |
| MYL6B_MOUSE | 0.382474 | 0   | 1.303576 |  | Myosin light chain 6B OS=Mus musculus GN=Myl6b PE=2 SV=1                                                      |
| PYR1_MOUSE  | 0.384037 | 0.2 | 1.304988 |  | CAD protein OS=Mus musculus GN=Cad PE=2 SV=1                                                                  |
| RTN4_MOUSE  | 0.384912 | 0.1 | 1.30578  |  | Reticulon-4 OS=Mus musculus GN=Rtn4 PE=1 SV=2                                                                 |
| KTN1_MOUSE  | 0.385735 | 0.1 | 1.306525 |  | Kinectin OS=Mus musculus GN=Ktn1 PE=2 SV=1                                                                    |
| E2F8_MOUSE  | 0.386205 | 0   | 1.306951 |  |                                                                                                               |
| MALT1_MOUSE | 0.386487 | 0.4 | 1.307206 |  | Mucosa-associated lymphoid tissue lymphoma translocation protein 1 homolog OS=Mus musculus GN=Malt1 PE=1 SV=2 |
| KLC2_MOUSE  | 0.388877 | 0.4 | 1.309374 |  | Kinesin light chain 2 OS=Mus musculus GN=Klc2 PE=1 SV=1                                                       |
| GFPT2_MOUSE | 0.393627 | 0   | 1.313692 |  | Glutamine--fructose-6-phosphate aminotransferase [isomerizing] 2 OS=Mus musculus GN=Gfpt2 PE=2 SV=3           |
| BAP31_MOUSE | 0.396808 | 0.1 | 1.316592 |  | B-cell receptor-associated protein 31 OS=Mus musculus GN=Bcap31 PE=1 SV=4                                     |
| RAB10_MOUSE | 0.405410 | 0.4 | 1.324465 |  | Ras-related protein Rab-10 OS=Mus musculus GN=Rab10 PE=1 SV=1                                                 |
| H1T_MOUSE   | 0.406704 | 0.2 | 1.325653 |  | Histone H1t OS=Mus musculus GN=Hist1h1t PE=1 SV=4                                                             |
| NDUA4_MOUSE | 0.411036 | 0.6 | 1.32964  |  | NADH dehydrogenase [ubiquinone] 1 alpha subcomplex subunit 4 OS=Mus musculus GN=Ndufa4 PE=1 SV=2              |
| RS27L_MOUSE | 0.411764 | 0.2 | 1.330311 |  | 40S ribosomal protein S27-like OS=Mus musculus GN=Rps27l PE=2 SV=3                                            |
| RRBP1_MOUSE | 0.414189 | 0.2 | 1.33255  |  | Ribosome-binding protein 1 OS=Mus musculus GN=Rrbp1 PE=1 SV=2                                                 |
| D19L1_MOUSE | 0.414387 | 0.2 | 1.332733 |  | Probable C-mannosyltransferase DPY19L1 OS=Mus musculus GN=Dpy19l1 PE=2 SV=1                                   |
| PRUNE_MOUSE | 0.414520 | 0.5 | 1.332855 |  | Protein prune homolog OS=Mus musculus GN=Prune PE=2 SV=1                                                      |
| UCHL5_MOUSE | 0.415921 | 0.2 | 1.33415  |  | Ubiquitin carboxyl-terminal hydrolase isozyme L5 OS=Mus musculus GN=Uchl5 PE=1 SV=2                           |
| SH3L3_MOUSE | 0.420241 | 0.2 | 1.338151 |  | SH3 domain-binding glutamic acid-rich-like protein 3 OS=Mus musculus GN=Sh3bgrl3 PE=1 SV=1                    |
| AN32B_MOUSE | 0.422776 | 0.4 | 1.340504 |  | Acidic leucine-rich nuclear phosphoprotein 32 family member B OS=Mus musculus GN=Anp32b PE=1 SV=1             |
| TYB10_MOUSE | 0.423131 | 0.4 | 1.340834 |  | Thymosin beta-10 OS=Mus musculus GN=Tmsb10 PE=2 SV=3                                                          |
| VASP_MOUSE  | 0.425311 | 0.3 | 1.342862 |  | Vasodilator-stimulated phosphoprotein OS=Mus musculus GN=Vasp PE=1 SV=4                                       |
| IDHP_MOUSE  | 0.427113 | 0.2 | 1.344541 |  | Isocitrate dehydrogenase [NADP], mitochondrial OS=Mus musculus                                                |

|             |          |     |          |  |                                                                                                   |
|-------------|----------|-----|----------|--|---------------------------------------------------------------------------------------------------|
|             |          |     |          |  | GN=ldh2 PE=1 SV=3                                                                                 |
| SFR1_MOUSE  | 0.428830 | 0.3 | 1.346141 |  | Swi5-dependent recombination DNA repair protein 1 homolog OS=Mus musculus GN=Sfr1 PE=1 SV=2       |
| CO6A1_MOUSE | 0.435420 | 0.2 | 1.352304 |  | Collagen alpha-1(VI) chain OS=Mus musculus GN=Col6a1 PE=2 SV=1                                    |
| CCD38_MOUSE | 0.438081 | 0.4 | 1.354801 |  |                                                                                                   |
| PPP5_MOUSE  | 0.439429 | 0.5 | 1.356067 |  | Serine/threonine-protein phosphatase 5 OS=Mus musculus GN=Ppp5c PE=1 SV=3                         |
| ILF2_MOUSE  | 0.445389 | 0.3 | 1.361681 |  | Interleukin enhancer-binding factor 2 OS=Mus musculus GN=Ilf2 PE=1 SV=1                           |
| ERLN2_MOUSE | 0.449599 | 0.1 | 1.36566  |  | Erlin-2 OS=Mus musculus GN=Erlin2 PE=1 SV=1                                                       |
| TTC9C_MOUSE | 0.456300 | 0   | 1.372019 |  | Tetratricopeptide repeat protein 9C OS=Mus musculus GN=Ttc9c PE=2 SV=1                            |
| SRA1_MOUSE  | 0.458491 | 0.1 | 1.374104 |  | Steroid receptor RNA activator 1 OS=Mus musculus GN=Sra1 PE=1 SV=3                                |
| RAB1A_MOUSE | 0.461907 | 0.5 | 1.377361 |  | Ras-related protein Rab-1A OS=Mus musculus GN=Rab1A PE=1 SV=3                                     |
| QCR6_MOUSE  | 0.462570 | 0.4 | 1.377995 |  | Cytochrome b-c1 complex subunit 6, mitochondrial OS=Mus musculus GN=Uqcrh PE=1 SV=2               |
| SAE2_MOUSE  | 0.463759 | 0   | 1.379131 |  | SUMO-activating enzyme subunit 2 OS=Mus musculus GN=Uba2 PE=1 SV=1                                |
| H2AZ_MOUSE  | 0.467525 | 0.2 | 1.382735 |  | Histone H2A.Z OS=Mus musculus GN=H2afz PE=1 SV=2                                                  |
| SMAD3_MOUSE | 0.476613 | 0.2 | 1.391473 |  | Mothers against decapentaplegic homolog 3 OS=Mus musculus GN=Smad3 PE=1 SV=2                      |
| IKIP_MOUSE  | 0.477947 | 0   | 1.39276  |  | Inhibitor of nuclear factor kappa-B kinase-interacting protein OS=Mus musculus GN=Ikkip PE=2 SV=2 |
| HBA_MOUSE   | 0.478404 | 0.4 | 1.393201 |  | Hemoglobin subunit alpha OS=Mus musculus GN=Hba PE=1 SV=2                                         |
| CALL3_MOUSE | 0.479895 | 0.5 | 1.394642 |  | Calmodulin-like protein 3 OS=Mus musculus GN=Calml3 PE=2 SV=1                                     |
| FBRL_MOUSE  | 0.481143 | 0.1 | 1.395849 |  | rRNA 2'-O-methyltransferase fibrillarin OS=Mus musculus GN=Fbl PE=2 SV=2                          |
| ARF4_MOUSE  | 0.486244 | 0.2 | 1.400793 |  | ADP-ribosylation factor 4 OS=Mus musculus GN=Arf4 PE=1 SV=2                                       |
| GCR_MOUSE   | 0.488620 | 0.1 | 1.403102 |  | Glucocorticoid receptor OS=Mus musculus GN=Nr3c1 PE=1 SV=1                                        |
| TBCA_MOUSE  | 0.491108 | 0.4 | 1.405524 |  | Tubulin-specific chaperone A OS=Mus musculus GN=Tbca PE=2 SV=3                                    |
| OFUT2_MOUSE | 0.495153 | 0.4 | 1.40947  |  | GDP-fucose protein O-fucosyltransferase 2 OS=Mus musculus GN=Pofut2 PE=1 SV=1                     |
| LTOR2_MOUSE | 0.499423 | 0.2 | 1.413648 |  | Ragulator complex protein LAMTOR2 OS=Mus musculus GN=Lamtor2 PE=1 SV=1                            |

|             |          |     |          |                                                                                                      |
|-------------|----------|-----|----------|------------------------------------------------------------------------------------------------------|
| ATPD_MOUSE  | 0.500446 | 0.3 | 1.41465  | ATP synthase subunit delta, mitochondrial OS=Mus musculus GN=Atp5d PE=1 SV=1                         |
| MKLN1_MOUSE | 0.500446 | 0.3 | 1.41465  |                                                                                                      |
| MP2K1_MOUSE | 0.501973 | 0.1 | 1.416149 | Dual specificity mitogen-activated protein kinase kinase 1 OS=Mus musculus GN=Map2k1 PE=1 SV=2       |
| REPS1_MOUSE | 0.508337 | 0.1 | 1.42241  | RalBP1-associated Eps domain-containing protein 1 OS=Mus musculus GN=Reps1 PE=1 SV=2                 |
| DHRS4_MOUSE | 0.509393 | 0.2 | 1.423451 | Dehydrogenase/reductase SDR family member 4 OS=Mus musculus GN=Dhrs4 PE=1 SV=3                       |
| PTMA_MOUSE  | 0.525322 | 0.4 | 1.439254 | Prothymosin alpha OS=Mus musculus GN=Ptma PE=1 SV=2                                                  |
| NC2B_MOUSE  | 0.527111 | 0.1 | 1.441041 | Protein Dr1 OS=Mus musculus GN=Dr1 PE=2 SV=1                                                         |
| FETUA_MOUSE | 0.530992 | 0.3 | 1.444922 | Alpha-2-HS-glycoprotein OS=Mus musculus GN=Ahsg PE=1 SV=1                                            |
| LAP2B_MOUSE | 0.531212 | 0.1 | 1.445143 | Lamina-associated polypeptide 2, isoforms beta/delta/epsilon/gamma OS=Mus musculus GN=Tmpo PE=1 SV=4 |
| PRS10_MOUSE | 0.532698 | 0.4 | 1.446632 | 26S protease regulatory subunit 10B OS=Mus musculus GN=Psmc6 PE=1 SV=1                               |
| NEST_MOUSE  | 0.533669 | 0.2 | 1.447606 | Nestin OS=Mus musculus GN=Nes PE=1 SV=1                                                              |
| NPTN_MOUSE  | 0.533795 | 0.1 | 1.447732 | Neuroplastin OS=Mus musculus GN=Nptn PE=1 SV=3                                                       |
| E41L3_MOUSE | 0.537226 | 0.5 | 1.451179 | Band 4.1-like protein 3 OS=Mus musculus GN=Epb41i3 PE=1 SV=1                                         |
| MEPCE_MOUSE | 0.537434 | 0.2 | 1.451389 | 7SK snRNA methylphosphate capping enzyme OS=Mus musculus GN=Mepce PE=1 SV=2                          |
| LAP2A_MOUSE | 0.537485 | 0   | 1.45144  | Lamina-associated polypeptide 2, isoforms alpha/zeta OS=Mus musculus GN=Tmpo PE=1 SV=4               |
| SRSF4_MOUSE | 0.550978 | 0   | 1.465078 | Serine/arginine-rich splicing factor 4 OS=Mus musculus GN=Srsf4 PE=2 SV=1                            |
| PR40A_MOUSE | 0.552884 | 0   | 1.467015 | Pre-mRNA-processing factor 40 homolog A OS=Mus musculus GN=Prpf40a PE=1 SV=1                         |
| H33_MOUSE   | 0.562486 | 0.2 | 1.476811 | Histone H3.3 OS=Mus musculus GN=H3f3a PE=1 SV=2                                                      |
| DHRS1_MOUSE | 0.567058 | 0.1 | 1.481499 | Dehydrogenase/reductase SDR family member 1 OS=Mus musculus GN=Dhrs1 PE=2 SV=1                       |
| IF1A_MOUSE  | 0.571096 | 0   | 1.485652 | Eukaryotic translation initiation factor 1A OS=Mus musculus GN=Eif1a PE=2 SV=3                       |
| PP14B_MOUSE | 0.595869 | 0.2 | 1.511382 | Protein phosphatase 1 regulatory subunit 14B OS=Mus musculus GN=Ppp1r14b PE=1 SV=2                   |
| IMMT_MOUSE  | 0.599209 | 0.1 | 1.514886 | Mitochondrial inner membrane protein OS=Mus musculus GN=Immt                                         |

|                   |          |     |          |  |                                                                                                         |
|-------------------|----------|-----|----------|--|---------------------------------------------------------------------------------------------------------|
|                   |          |     |          |  | PE=1 SV=1                                                                                               |
| MBB1A_MOUSE<br>E  | 0.601030 | 0   | 1.5168   |  | Myb-binding protein 1A OS=Mus musculus GN=Mybbp1a PE=1 SV=2                                             |
| RIR1_MOUSE        | 0.603171 | 0   | 1.519051 |  | Ribonucleoside-diphosphate reductase large subunit OS=Mus musculus GN=Rrm1 PE=1 SV=2                    |
| IF2B2_MOUSE       | 0.607204 | 0.2 | 1.523304 |  | Insulin-like growth factor 2 mRNA-binding protein 2 OS=Mus musculus GN=Igf2bp2 PE=1 SV=1                |
| H13_MOUSE         | 0.627204 | 0   | 1.544569 |  | Histone H1.3 OS=Mus musculus GN=Hist1h1d PE=1 SV=2                                                      |
| RANB3_MOUSE<br>E  | 0.630777 | 0.3 | 1.548399 |  | Ran-binding protein 3 OS=Mus musculus GN=Ranbp3 PE=1 SV=2                                               |
| SPF27_MOUSE<br>E  | 0.635218 | 0.3 | 1.553173 |  | Pre-mRNA-splicing factor SPF27 OS=Mus musculus GN=Bcas2 PE=2 SV=1                                       |
| P20L1_MOUSE       | 0.637010 | 0   | 1.555103 |  | PHD finger protein 20-like protein 1 OS=Mus musculus GN=Phf20l1 PE=2 SV=2                               |
| HMGA2_MOUSE<br>E  | 0.643604 | 0.1 | 1.562227 |  | High mobility group protein HMGI-C OS=Mus musculus GN=Hmga2 PE=1 SV=1                                   |
| EDF1_MOUSE        | 0.643840 | 0.3 | 1.562482 |  | Endothelial differentiation-related factor 1 OS=Mus musculus GN=Edf1 PE=1 SV=1                          |
| TECR_MOUSE        | 0.644426 | 0.2 | 1.563117 |  | Very-long-chain enoyl-CoA reductase OS=Mus musculus GN=Tecr PE=1 SV=1                                   |
| ITAL_MOUSE        | 0.649337 | 0.1 | 1.568448 |  | Integrin alpha-L OS=Mus musculus GN=Itgal PE=1 SV=2                                                     |
| ABCE1_MOUSE<br>E  | 0.650618 | 0.1 | 1.56984  |  | ATP-binding cassette sub-family E member 1 OS=Mus musculus GN=Abce1 PE=2 SV=1                           |
| C1QBP_MOUSE<br>E  | 0.665730 | 0.2 | 1.586371 |  | Complement component 1 Q subcomponent-binding protein, mitochondrial OS=Mus musculus GN=C1qbp PE=1 SV=1 |
| AT2B2_MOUSE<br>E  | 0.671810 | 0.2 | 1.59307  |  | Plasma membrane calcium-transporting ATPase 2 OS=Mus musculus GN=Atp2b2 PE=1 SV=2                       |
| DVL3_MOUSE        | 0.674132 | 0.3 | 1.595637 |  | Segment polarity protein dishevelled homolog DVL-3 OS=Mus musculus GN=Dvl3 PE=1 SV=2                    |
| RFPLA_MOUSE<br>E  | 0.691521 | 0.2 | 1.614985 |  | Ret finger protein-like 4A OS=Mus musculus GN=Rfpl4a PE=2 SV=1                                          |
| WNK1_MOUSE        | 0.703097 | 0.6 | 1.627996 |  | Serine/threonine-protein kinase WNK1 OS=Mus musculus GN=Wnk1 PE=1 SV=2                                  |
| NDUS5_MOUSE<br>E  | 0.703673 | 0.1 | 1.628646 |  | NADH dehydrogenase [ubiquinone] iron-sulfur protein 5 OS=Mus musculus GN=Ndufs5 PE=1 SV=3               |
| FKBP11_MOUSE<br>E | 0.704716 | 0.6 | 1.629824 |  | Peptidyl-prolyl cis-trans isomerase FKBP11 OS=Mus musculus GN=Fkbp11 PE=2 SV=1                          |
| SC22B_MOUSE<br>E  | 0.707687 | 0.1 | 1.633183 |  | Vesicle-trafficking protein SEC22b OS=Mus musculus GN=Sec22b PE=1 SV=3                                  |
| PUR8_MOUSE        | 0.718084 | 0.1 | 1.644996 |  | Adenylosuccinate lyase OS=Mus                                                                           |

|             |          |     |          |  |                                                                                                |
|-------------|----------|-----|----------|--|------------------------------------------------------------------------------------------------|
|             |          |     |          |  | musculus GN=Adsl PE=2 SV=2                                                                     |
| BIEA_MOUSE  | 0.734828 | 0   | 1.664199 |  | Biliverdin reductase A OS=Mus musculus GN=Blvra PE=2 SV=1                                      |
| ADT4_MOUSE  | 0.752110 | 0   | 1.684254 |  | ADP/ATP translocase 4 OS=Mus musculus GN=Slc25a31 PE=2 SV=1                                    |
| H2AY_MOUSE  | 0.761745 | 0.3 | 1.69554  |  | Core histone macro-H2A.1 OS=Mus musculus GN=H2afy PE=1 SV=3                                    |
| GSLG1_MOUSE | 0.771952 | 0.3 | 1.707579 |  | Golgi apparatus protein 1 OS=Mus musculus GN=Glg1 PE=1 SV=1                                    |
| EVL_MOUSE   | 0.778213 | 0   | 1.715005 |  | Ena/VASP-like protein OS=Mus musculus GN=Evl PE=1 SV=2                                         |
| RPC2_MOUSE  | 0.780418 | 0   | 1.717628 |  | DNA-directed RNA polymerase III subunit RPC2 OS=Mus musculus GN=Polr3b PE=2 SV=2               |
| SLK_MOUSE   | 0.789592 | 0.1 | 1.728586 |  | STE20-like serine/threonine-protein kinase OS=Mus musculus GN=Slk PE=1 SV=2                    |
| LARP7_MOUSE | 0.790086 | 0   | 1.729178 |  | La-related protein 7 OS=Mus musculus GN=Larp7 PE=1 SV=2                                        |
| ATPG_MOUSE  | 0.849791 | 0   | 1.80224  |  | ATP synthase subunit gamma, mitochondrial OS=Mus musculus GN=Atp5c1 PE=1 SV=1                  |
| H2A2B_MOUSE | 0.867560 | 0   | 1.824574 |  | Histone H2A type 2-B OS=Mus musculus GN=Hist2h2ab PE=1 SV=3                                    |
| ZBT43_MOUSE | 0.883939 | 0.1 | 1.845407 |  | Zinc finger and BTB domain-containing protein 43 OS=Mus musculus GN=Zbtb43 PE=2 SV=2           |
| HECD1_MOUSE | 0.898640 | 0.3 | 1.864307 |  | E3 ubiquitin-protein ligase HECTD1 OS=Mus musculus GN=Hectd1 PE=1 SV=2                         |
| ALBU_MOUSE  | 0.907684 | 0.3 | 1.876031 |  | Serum albumin OS=Mus musculus GN=Alb PE=1 SV=3                                                 |
| MEP50_MOUSE | 0.921289 | 0.4 | 1.893807 |  | Methylosome protein 50 OS=Mus musculus GN=Wdr77 PE=1 SV=1                                      |
| MAP6_MOUSE  | 0.960701 | 0   | 1.946255 |  | Microtubule-associated protein 6 OS=Mus musculus GN=Map6 PE=1 SV=2                             |
| PLP2_MOUSE  | 0.968741 | 0.4 | 1.957132 |  | Proteolipid protein 2 OS=Mus musculus GN=Plp2 PE=2 SV=1                                        |
| M4K4_MOUSE  | 1.004881 | 0.1 | 2.006777 |  | Mitogen-activated protein kinase kinase kinase 4 OS=Mus musculus GN=Map4k4 PE=1 SV=1           |
| EHD3_MOUSE  | 1.008355 | 0   | 2.011615 |  | EH domain-containing protein 3 OS=Mus musculus GN=Ehd3 PE=1 SV=2                               |
| FBLN3_MOUSE | 1.010373 | 0.1 | 2.014431 |  | EGF-containing fibulin-like extracellular matrix protein 1 OS=Mus musculus GN=Efemp1 PE=2 SV=1 |
| PI3R4_MOUSE | 1.022615 | 0.2 | 2.031597 |  | Phosphoinositide 3-kinase regulatory subunit 4 OS=Mus musculus GN=Pik3r4 PE=1 SV=3             |
| HAP28_MOUSE | 1.123091 | 0.7 | 2.178132 |  | 28 kDa heat- and acid-stable phosphoprotein OS=Mus musculus GN=Pdap1 PE=1 SV=1                 |
| ATPO_MOUSE  | 1.164437 | 0.6 | 2.241457 |  | ATP synthase subunit O, mitochondrial OS=Mus musculus                                          |



|                                          |           |     |          |  |                                                                                                |
|------------------------------------------|-----------|-----|----------|--|------------------------------------------------------------------------------------------------|
|                                          |           |     |          |  | GN=Atp5o PE=1 SV=1                                                                             |
| NUFP2_MOUSE                              | 1.298795  | 0.1 | 2.460232 |  | Nuclear fragile X mental retardation-interacting protein 2 OS=Mus musculus GN=Nufip2 PE=1 SV=1 |
| MRCKB_MOUSE                              | 1.353744  | 0.3 | 2.555745 |  | Serine/threonine-protein kinase MRCK beta OS=Mus musculus GN=Cdc42bpb PE=1 SV=2                |
| CPPED_MOUSE                              | 1.474910  | 0   | 2.779663 |  | Serine/threonine-protein phosphatase CPPED1 OS=Mus musculus GN=Cpped1 PE=2 SV=1                |
| ABRA_MOUSE                               | 1.561250  | 0.3 | 2.951095 |  |                                                                                                |
| H2AX_MOUSE                               | 1.567391  | 0.1 | 2.963682 |  | Histone H2AX OS=Mus musculus GN=H2afx PE=1 SV=2                                                |
| BRCC3_MOUSE                              | 1.613716  | 0.4 | 3.060391 |  | Lys-63-specific deubiquitinase BRCC36 OS=Mus musculus GN=Brcc3 PE=2 SV=1                       |
| ARP3B_MOUSE                              | 1.795556  | 0.6 | 3.471492 |  | Actin-related protein 3B OS=Mus musculus GN=Actr3b PE=2 SV=1                                   |
| FRIL2_MOUSE                              | 2.195888  | 0.4 | 4.581715 |  | Ferritin light chain 2 OS=Mus musculus GN=Ftl2 PE=2 SV=2                                       |
| <b>Other reported targets of miR-214</b> |           |     |          |  |                                                                                                |
| CTNB1_MOUSE                              | -0.181716 | 0.6 | 0.881654 |  | Catenin beta-1 OS=Mus musculus GN=Ctnnb1 PE=1 SV=1                                             |
| PCBP2_MOUSE                              | -0.042262 | 0.8 | 0.971131 |  | Poly(rC)-binding protein 2 OS=Mus musculus GN=Pcbp2 PE=1 SV=1                                  |
|                                          |           |     |          |  |                                                                                                |
|                                          |           |     |          |  |                                                                                                |
|                                          |           |     |          |  |                                                                                                |
|                                          |           |     |          |  |                                                                                                |
|                                          |           |     |          |  |                                                                                                |
|                                          |           |     |          |  |                                                                                                |
|                                          |           |     |          |  |                                                                                                |
|                                          |           |     |          |  |                                                                                                |
|                                          |           |     |          |  |                                                                                                |

**Supplementary table S3: GO term enrichment analysis of down-regulated proteins by miR-214 in VSMCs.**

| Analysis Type:                                                      | PANTHER Overrepresentation Test (release 20160321) |               |                     |                       |                            |                     |                                                                                                                                         |
|---------------------------------------------------------------------|----------------------------------------------------|---------------|---------------------|-----------------------|----------------------------|---------------------|-----------------------------------------------------------------------------------------------------------------------------------------|
| Annotation Version and Release Date:                                | GO Ontology database Released 2016-04-23           |               |                     |                       |                            |                     |                                                                                                                                         |
| Analyzed List:                                                      | Down-regulated (Mus musculus)                      |               |                     |                       |                            |                     |                                                                                                                                         |
| Reference List:                                                     | Mus musculus (all genes in database)               |               |                     |                       |                            |                     |                                                                                                                                         |
| Bonferroni correction:                                              | TRUE                                               |               |                     |                       |                            |                     |                                                                                                                                         |
| GO biological process complete                                      | Mus musculus - REFLIST (22320)                     | Proteins (56) | Proteins (expected) | Proteins (over/under) | Proteins (fold Enrichment) | Proteins (P-value)* | Protein name                                                                                                                            |
| regulation of actin filament polymerization (GO:0030833)            | 137                                                | 6             | 0.34                | +                     | 17.46                      | 1.05E-02            | NCKPA1, RHOA, ARPC2, SPTB1, PROF1, CAPZB                                                                                                |
| regulation of protein polymerization (GO:0032271)                   | 174                                                | 7             | 0.44                | +                     | 16.03                      | 2.29E-03            | NCKPA1, RHOA, ARPC2, SPTB1, PROF1, CAPZB, EMAL1                                                                                         |
| regulation of actin polymerization or depolymerization (GO:0008064) | 156                                                | 6             | 0.39                | +                     | 15.33                      | 2.21E-02            | NCKPA1, RHOA, ARPC2, SPTB1, PROF1, CAPZB                                                                                                |
| regulation of actin filament length (GO:0030832)                    | 157                                                | 6             | 0.39                | +                     | 15.23                      | 2.30E-02            | NCKPA1, RHOA, ARPC2, SPTB1, PROF1, CAPZB                                                                                                |
| regulation of actin cytoskeleton organization (GO:0032956)          | 278                                                | 7             | 0.7                 | +                     | 10.04                      | 4.99E-02            | NCKPA1, RHOA, ARPC2, SPTB1, PROF1, CAPZB, PPM1F                                                                                         |
| organelle organization (GO:0006996)                                 | 2779                                               | 21            | 6.97                | +                     | 3.01                       | 1.30E-02            | NCKAP1, RHOA, STK25, SNX12, PLS1, THIM, TPP1, CATD, EMAL1, ARPC2, PPM1F, PROF1, ABL2, SMC3, ARL3, SNX5, SNP29, LONM, SMC1A, CAPZB, APC7 |
|                                                                     |                                                    |               |                     |                       |                            |                     |                                                                                                                                         |
